# Supplementary material for: Development and Validation of A Rapid Lateral Flow E1/E2-Antigen Test and ELISA in Patients Infected with Emerging Asian Strain of Chikungunya Virus in The Americas
Source: Preprints.org preprint supplement (doi:10.20944/preprints202008.0309.v1), 2020-08-14
Supplement: Supplementary file 1 [file supplementary]

Archive with 8 entries (8 files):
- Supp_Legends.pdf
- __MACOSX/._Supp_Legends.pdf
- Supp_Table1.pdf
- __MACOSX/._Supp_Table1.pdf
- SuppFig1 (1).tiff
- __MACOSX/._SuppFig1 (1).tiff
- SuppFig2 (1).tiff
- __MACOSX/._SuppFig2 (1).tiff
