# Supplementary material for: Development and Validation of A Rapid Lateral Flow E1/E2-Antigen Test and ELISA in Patients Infected with Emerging Asian Strain of Chikungunya Virus in The Americas
Source: Preprints.org preprint supplement (doi:10.20944/preprints202008.0309.v1), 2020-08-14
Supplement: Supplementary file 1 [file supplementary › Supp_Legends.pdf]

**Figure S1: Binding of CHIKV antibodies.** Monoclonal antibody clones were generated from CHIKV-immunized mice. The OD<sub>450</sub> when antibodies were treated with Chikungunya VLP or Mayaro VLP is represented as fold above background.

**Figure S2: Limit of Detection of Antibody Pairs to detect CHIKV.** Limits of Detection (LoD) were calculated using either Combination A (48 and 155) or Combination B (B.1 and B.2) antibodies. The LoD for Combination A were measured in dipstick format (A-B), lateral flow format (C-D), and ELISA (E-F), all by measuring the normalized signal intensity with decreasing concentrations of CHIKV E1 and E2. The LoD was measured for Combination B in a lateral flow format using decreasing concentrations of CHIKV virus-like particles (VLP) (G).
