# Supplementary material for: Development and Validation of A Rapid Lateral Flow E1/E2-Antigen Test and ELISA in Patients Infected with Emerging Asian Strain of Chikungunya Virus in The Americas
Source: Preprints.org preprint supplement (doi:10.20944/preprints202008.0309.v1), 2020-08-14
Supplement: Supplementary file 1 [file supplementary › Supp_Table1.pdf]

**Table S1: Limits of Detection of Antibody Pairs to detect CHIKV.** The limits of detection (LoD) and dissociation constant ( $K_d$ ) were calculated for antibody Combination A (48 and 155) for the dipstick, lateral flow, and ELISA format using decreasing concentrations of E1 and E2. LoD and  $K_d$  was calculated for antibody Combination B (B.1 and B.2) for the lateral flow format using decreasing concentrations of CHIKV virus-like particles (VLP).

|                        | Dipstick | Lateral Flow | Lateral Flow | ELISA   |
|------------------------|----------|--------------|--------------|---------|
| <b>Antibody Pair</b>   | 48; 155  | 48; 155      | B.1; B.2     | 48; 155 |
| <b>E1 LoD (ng/mL)</b>  | 15.55    | 844.16       |              | 133.48  |
| <b>E1 Kd</b>           | 125.81   | 2402.61      |              | 400.43  |
| <b>E2 LoD (ng/mL)</b>  | 37.08    | 875.86       |              | 363.98  |
| <b>E2 Kd</b>           | 202.15   | 299.79       |              | 1091.93 |
| <b>VLP LoD (ng/mL)</b> |          |              | 76.90        |         |
| <b>VLP Kd</b>          |          |              | 78.46        |         |
