# Supplementary figures and images for: Development and Validation of A Rapid Lateral Flow E1/E2-Antigen Test and ELISA in Patients Infected with Emerging Asian Strain of Chikungunya Virus in The Americas
Source: Preprints.org preprint supplement (doi:10.20944/preprints202008.0309.v1), 2020-08-14

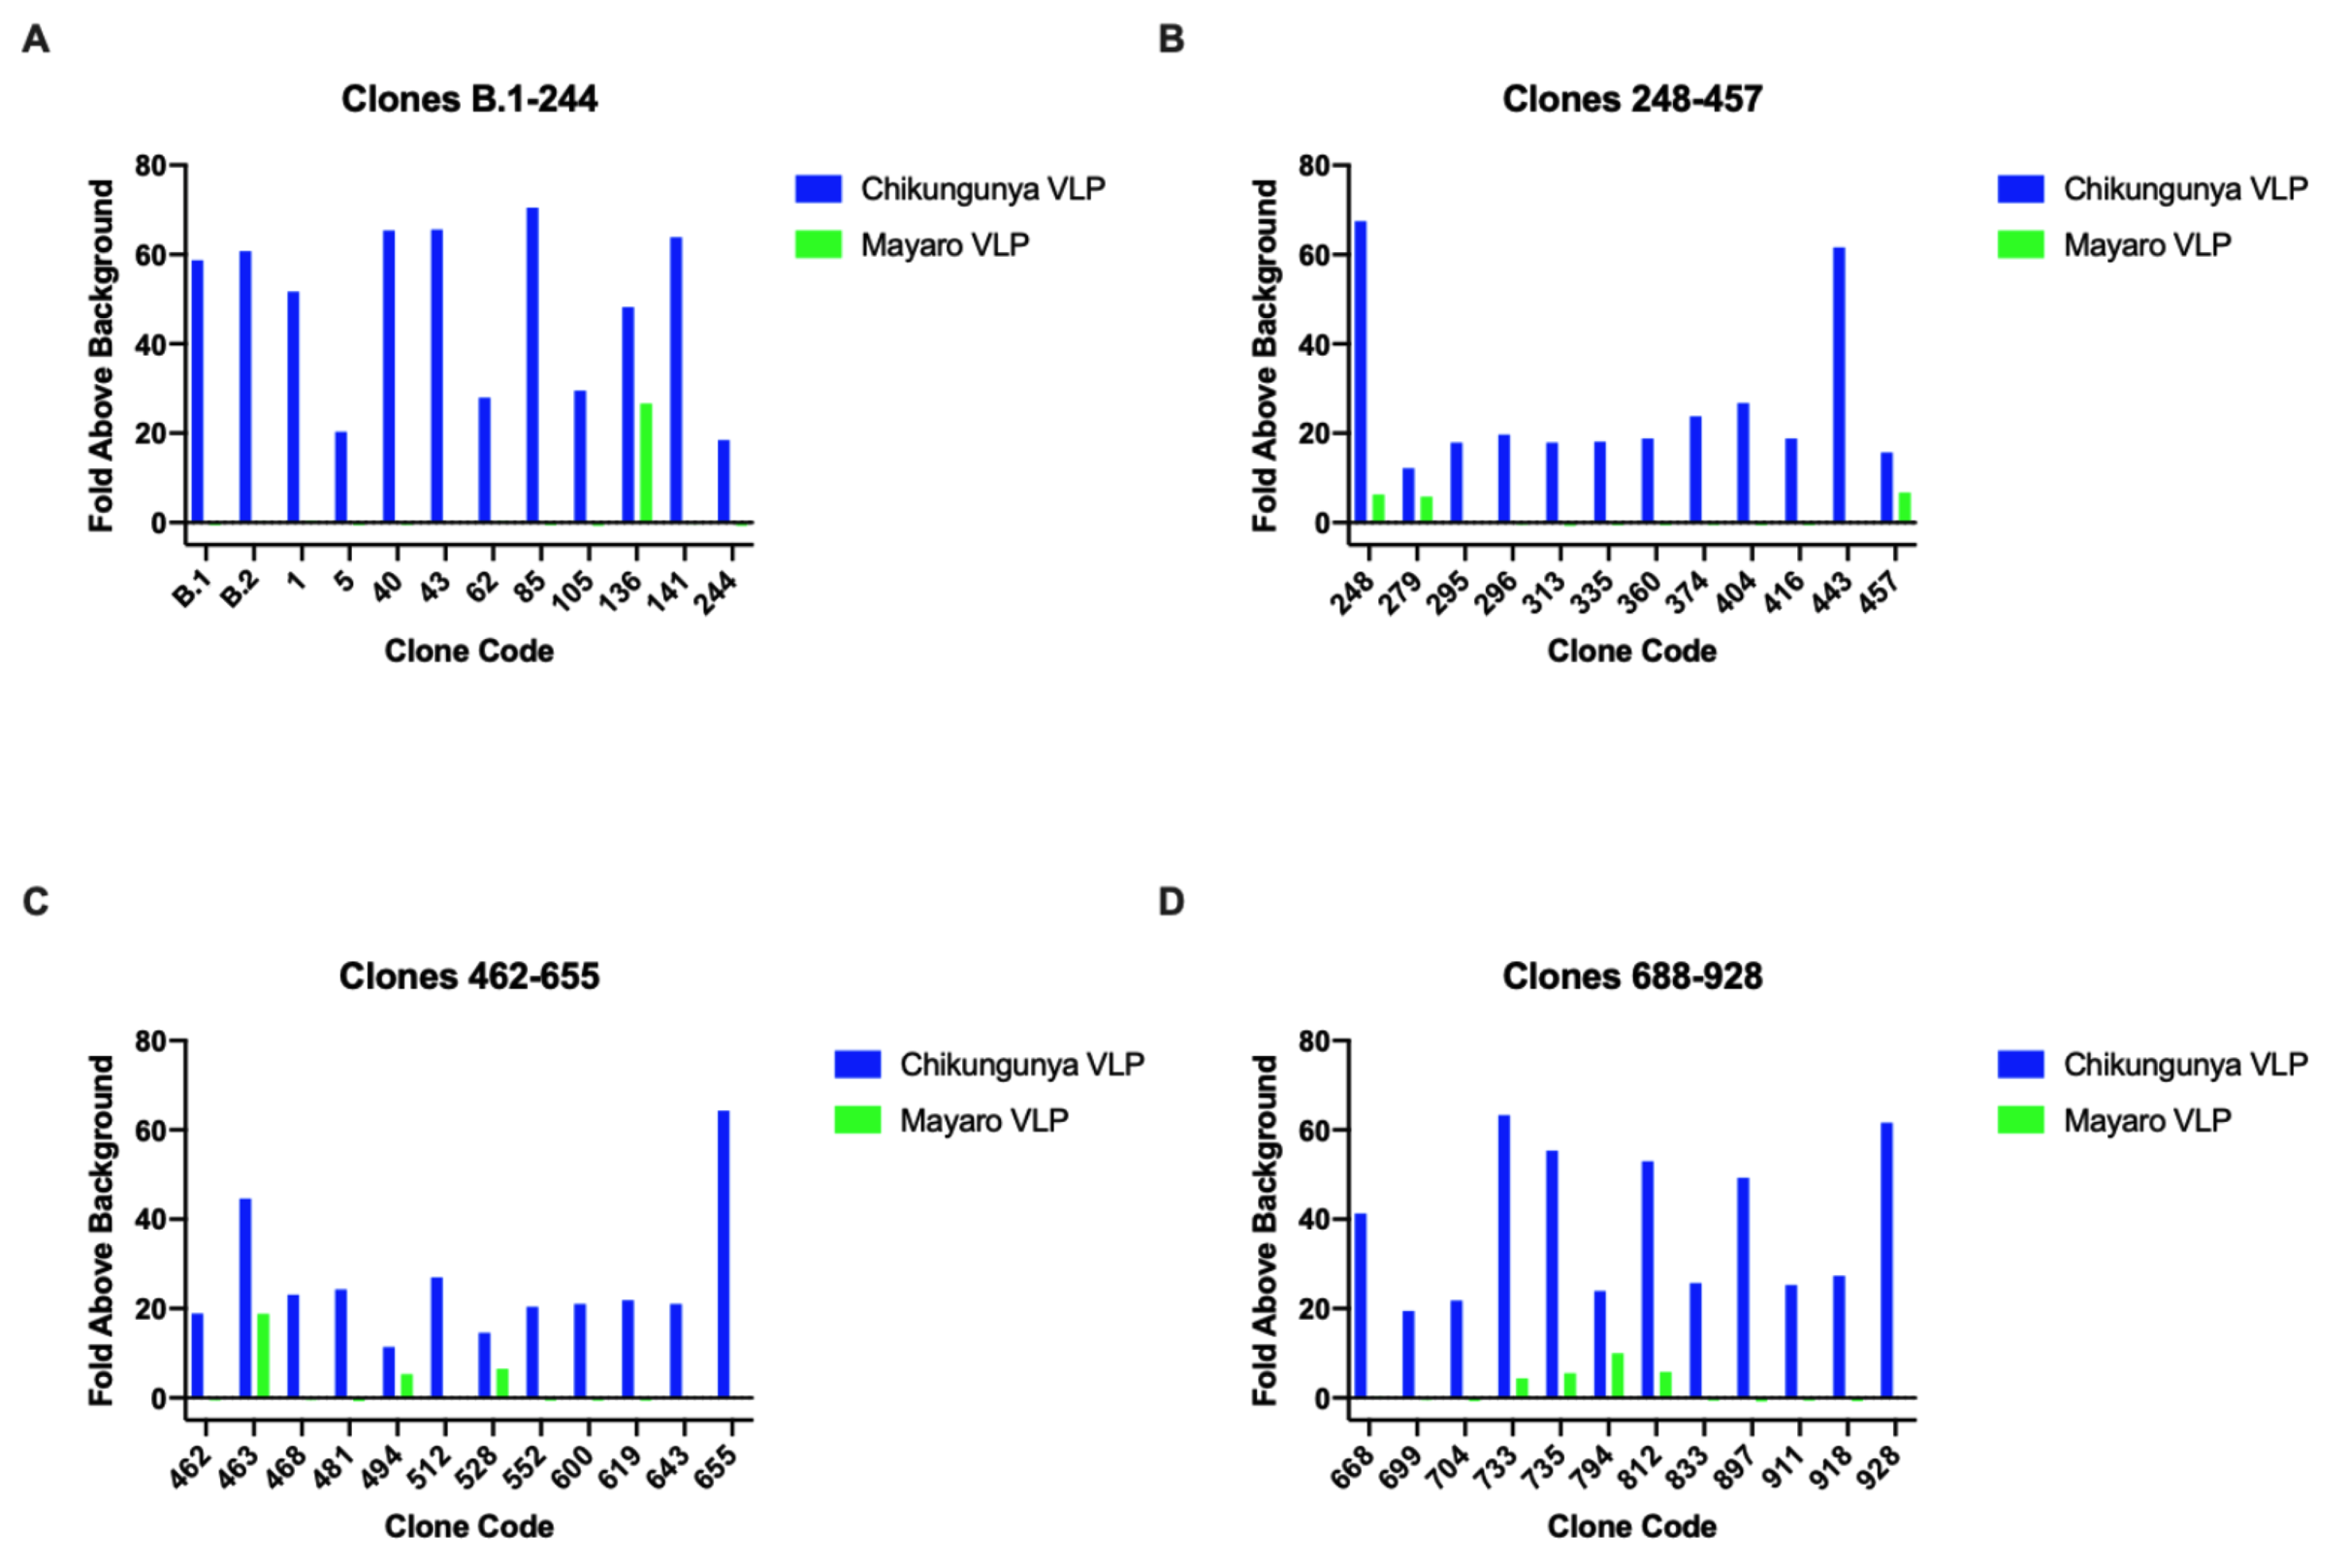

Supplement: Supplementary file 1 [file supplementary › SuppFig1 (1).tiff]

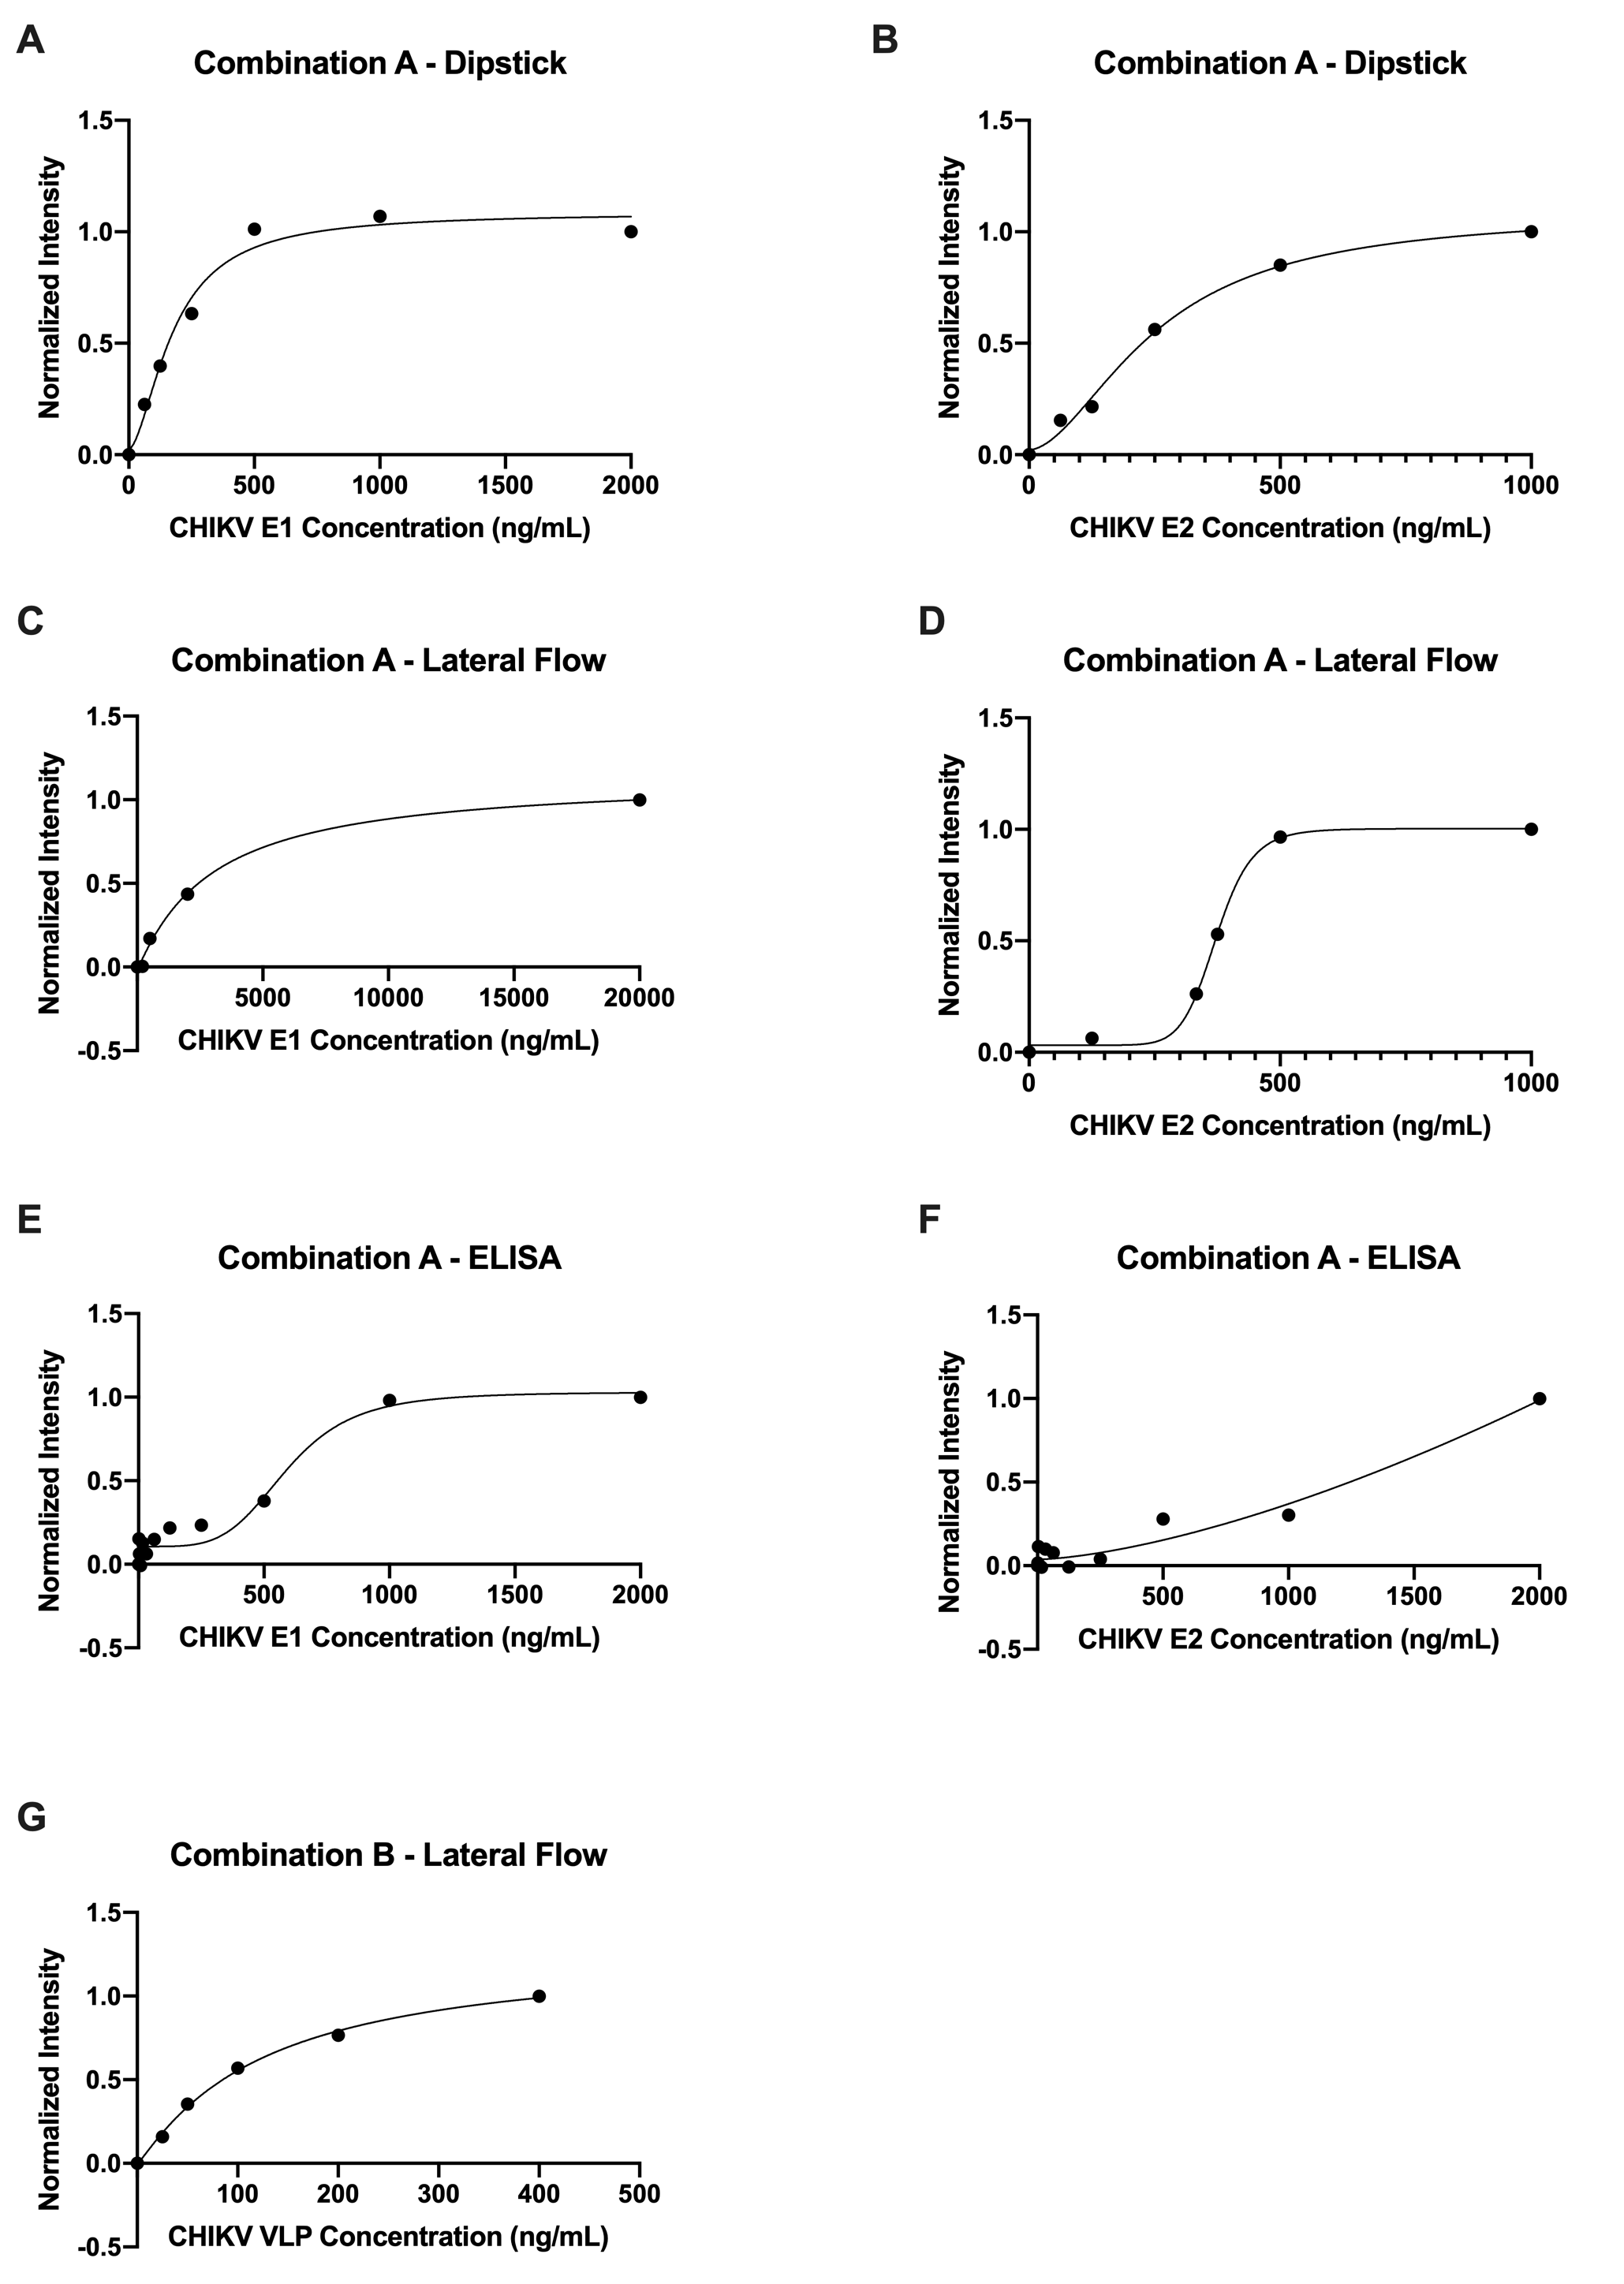

Supplement: Supplementary file 1 [file supplementary › SuppFig2 (1).tiff]
